# Supplementary material for: Colicin E1 opens its hinge to plug TolC
Source: eLife. 2022 Feb 24;11:e73297. doi: 10.7554/eLife.73297 (PMC9020818; doi:10.7554/eLife.73297)
Supplement: Figure 1—source data 1. [file elife-73297-fig1-data1.xlsx]

## Sheet: Figure 1, source data 1
	TolC	TolC + ColE1
Map accession	EMDB-21960	EMDB-21959
Model accession	PDB 6WXI	PDB 6WXH
Release date	May 12, 2021	May 12, 2021
Data collection and processing
Electron microscope	Talos Arctica	Talos Arctica
Magnification	130,000×	205,000×
Voltage (kV)	200	200
Electron exposure (e–/Å2)	33.04	35.96
Defocus range (μm)	0.5-2.6	0.4-2.1
Pixel size (Å)	1.038	0.6578
Symmetry imposed	C3	C1 (C3)
Initial particle images (no.)	2092678	339779
Final particle images (no.)	778220	179834
Map resolution (Å)	2.84	3.09 (2.81)
FSC threshold	0.143	0.143
Refinement
Initial model used (PDB code)	6WXH	1TQQ
Model resolution (Å)	3.11	3.37
FSC threshold	0.5	0.5
R.m.s. deviations
Bond lengths (Å)	0.0072	0.012
Bond angles (°)	1.11	1.76
Validation
MolProbity score	1.33	0.5
Clashscore	4.42	0
Poor rotamers (%)	1.4	0.18
Ramachandran plot
Favored (%)	98.12	98.31
Allowed (%)	1.88	1.32
Disallowed (%)	0	0.37
