# Supplementary material for: Colicin E1 opens its hinge to plug TolC
Source: eLife. 2022 Feb 24;11:e73297. doi: 10.7554/eLife.73297 (PMC9020818; doi:10.7554/eLife.73297)
Supplement: Figure 4—source data 1. [file elife-73297-fig4-data1.xlsx]

## Sheet: Figure 4, source data 1
				percent of cells with puncta (cells counted)		average number of puncta
del tolA				ColE1-TR	ColE1-TRΔ1-40	ColE1-TR	ColE1-TRΔ1-40
WT: 91% of cells have puncta (97/107)			WT	94% (111)	91% (107)	1.2	1.2
ΔtolC: 16% of cells have puncta (17/104)			ΔtolC	18% (99)	16% (104)	0.2	0.2
BL21: 2% of cells have puncta (2/102)			ΔbtuB	3% (105)	2% (102)	0	0
