# Supplementary material for: Colicin E1 opens its hinge to plug TolC
Source: eLife. 2022 Feb 24;11:e73297. doi: 10.7554/eLife.73297 (PMC9020818; doi:10.7554/eLife.73297)
Supplement: Figure 5—source data 1. [file elife-73297-fig5-data1.xlsx]

## Sheet: Figure 5, source data 1
	Erythromycin (μg/mL)	Ciprofloxacin (ng/mL)	Benzalkonium Chloride (μg/mL)
WT	625	56.25	50
ΔtolC	7.03	10.16	4.125
WT + 10 μM ColE1-TR	312.5	75	50
WT + 100 μM ColE1-TR	312.5	28.13	25
